# Supplementary material
Source: PubMed Central journal article supplement (PMC4005975)

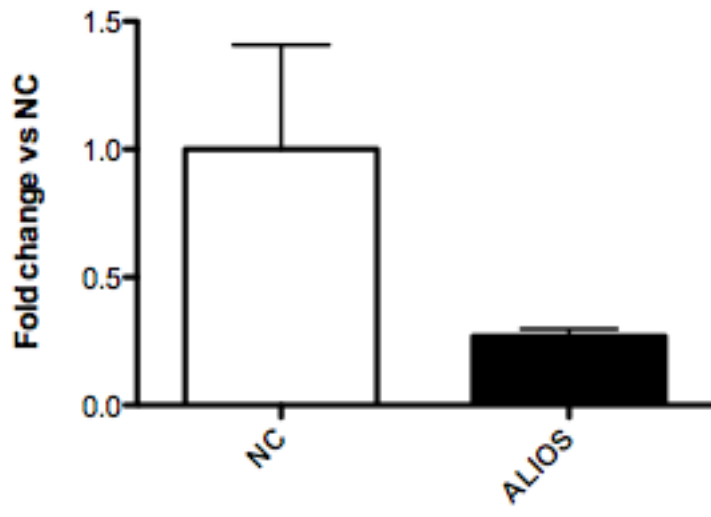

Supplement: mmc2.pdf [file mmc2.pdf]

**A**

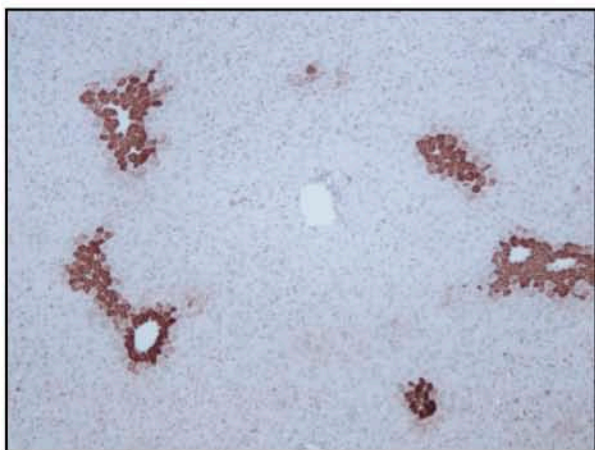

**B**

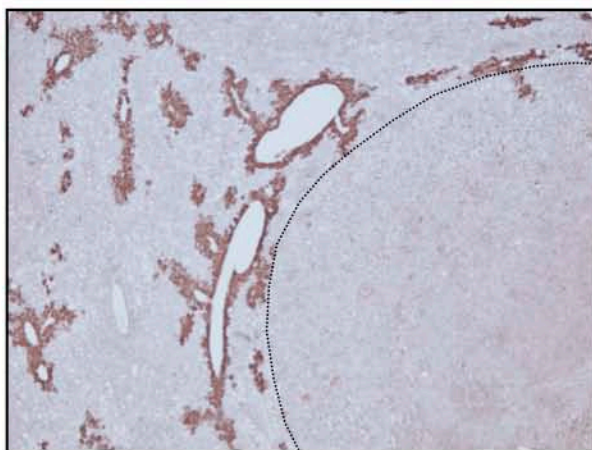

Supplement: mmc3.pdf [file mmc3.pdf]
